# Supplementary material for: Trajectories of 12-Month Usage Patterns for Two Smoking Cessation Websites: Exploring How Users Engage Over Time
Source: PubMed Central journal article supplement (PMC5935807; doi:10.2196/10143), 2018-04-20
Supplement: jmir_v20i4e10143_app2.pdf [file jmir_v20i4e10143_app2.pdf]

**Supplementary Table: Age as dichotomous variable (reference: <30, age not selected in SmokeFree arm), OR reported with one-week users as comparison group.**

|                      | WebQuit   |      |              | SmokeFree       |                      |        |             |
|----------------------|-----------|------|--------------|-----------------|----------------------|--------|-------------|
|                      |           | OR   | 95% CI       |                 | OR)                  | 95% CI |             |
| Five week users      |           |      |              | Four week users |                      |        |             |
|                      | Age 30-39 | 1.48 | (0.94,2.35)  |                 | Less than half pack  | 1.16   | (0.85,1.61) |
|                      | Age 40-49 | 1.86 | (1.19,2.90)  |                 | Unemployed           | 1.33   | (1.03,1.72) |
|                      | Age 50+   | 2.05 | (1.37,3.07)  |                 | No PTSD <sup>a</sup> | 1.43   | (1.11,1.85) |
| Fifty-two week users |           |      |              | Five week users |                      |        |             |
|                      | Age 30-39 | 4.24 | (1.57,11.42) |                 | Less than half pack  | 1.72   | (1.23,2.44) |
|                      | Age 40-49 | 5.07 | (1.91,13.45) |                 | Unemployed           | 1.79   | (1.33,2.38) |
|                      | Age 50+   | 8.37 | (3.32,21.09) |                 | No PTSD <sup>a</sup> | 1.16   | (0.88,1.56) |

<sup>a</sup>No PTSD refers to screening negative for Post-Traumatic Stress Disorder.
